# Supplementary material for: Topographical Distribution and Spatial Interactions of Innate and Semi-Innate Immune Cells in Pancreatic and Other Periampullary Adenocarcinoma
Source: PubMed Central journal article supplement (PMC7511775; doi:10.3389/fimmu.2020.558169), 2020-09-10

Additional File 2: Relationship between immune cell infiltration and clinicopathological features.

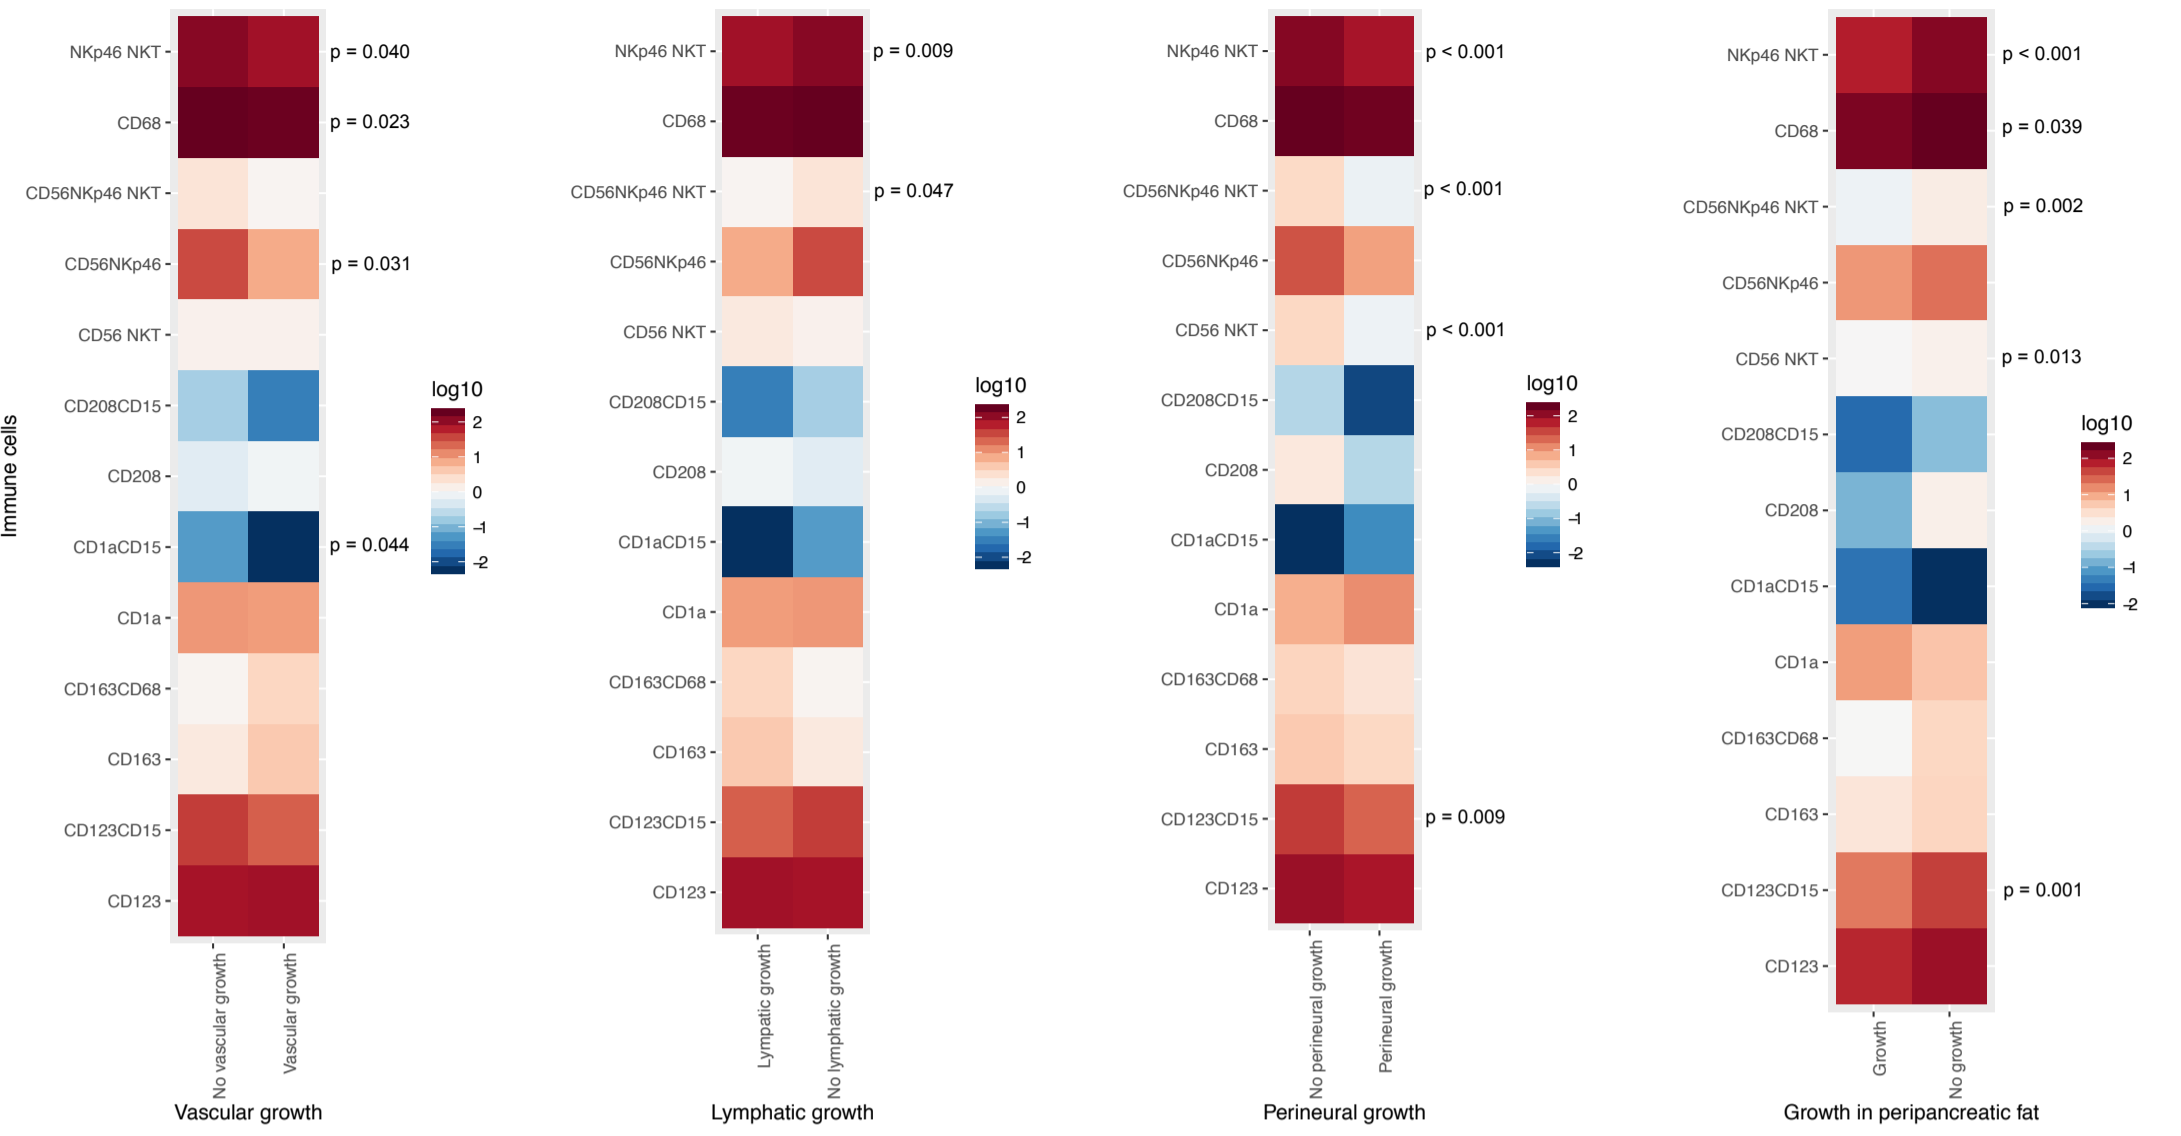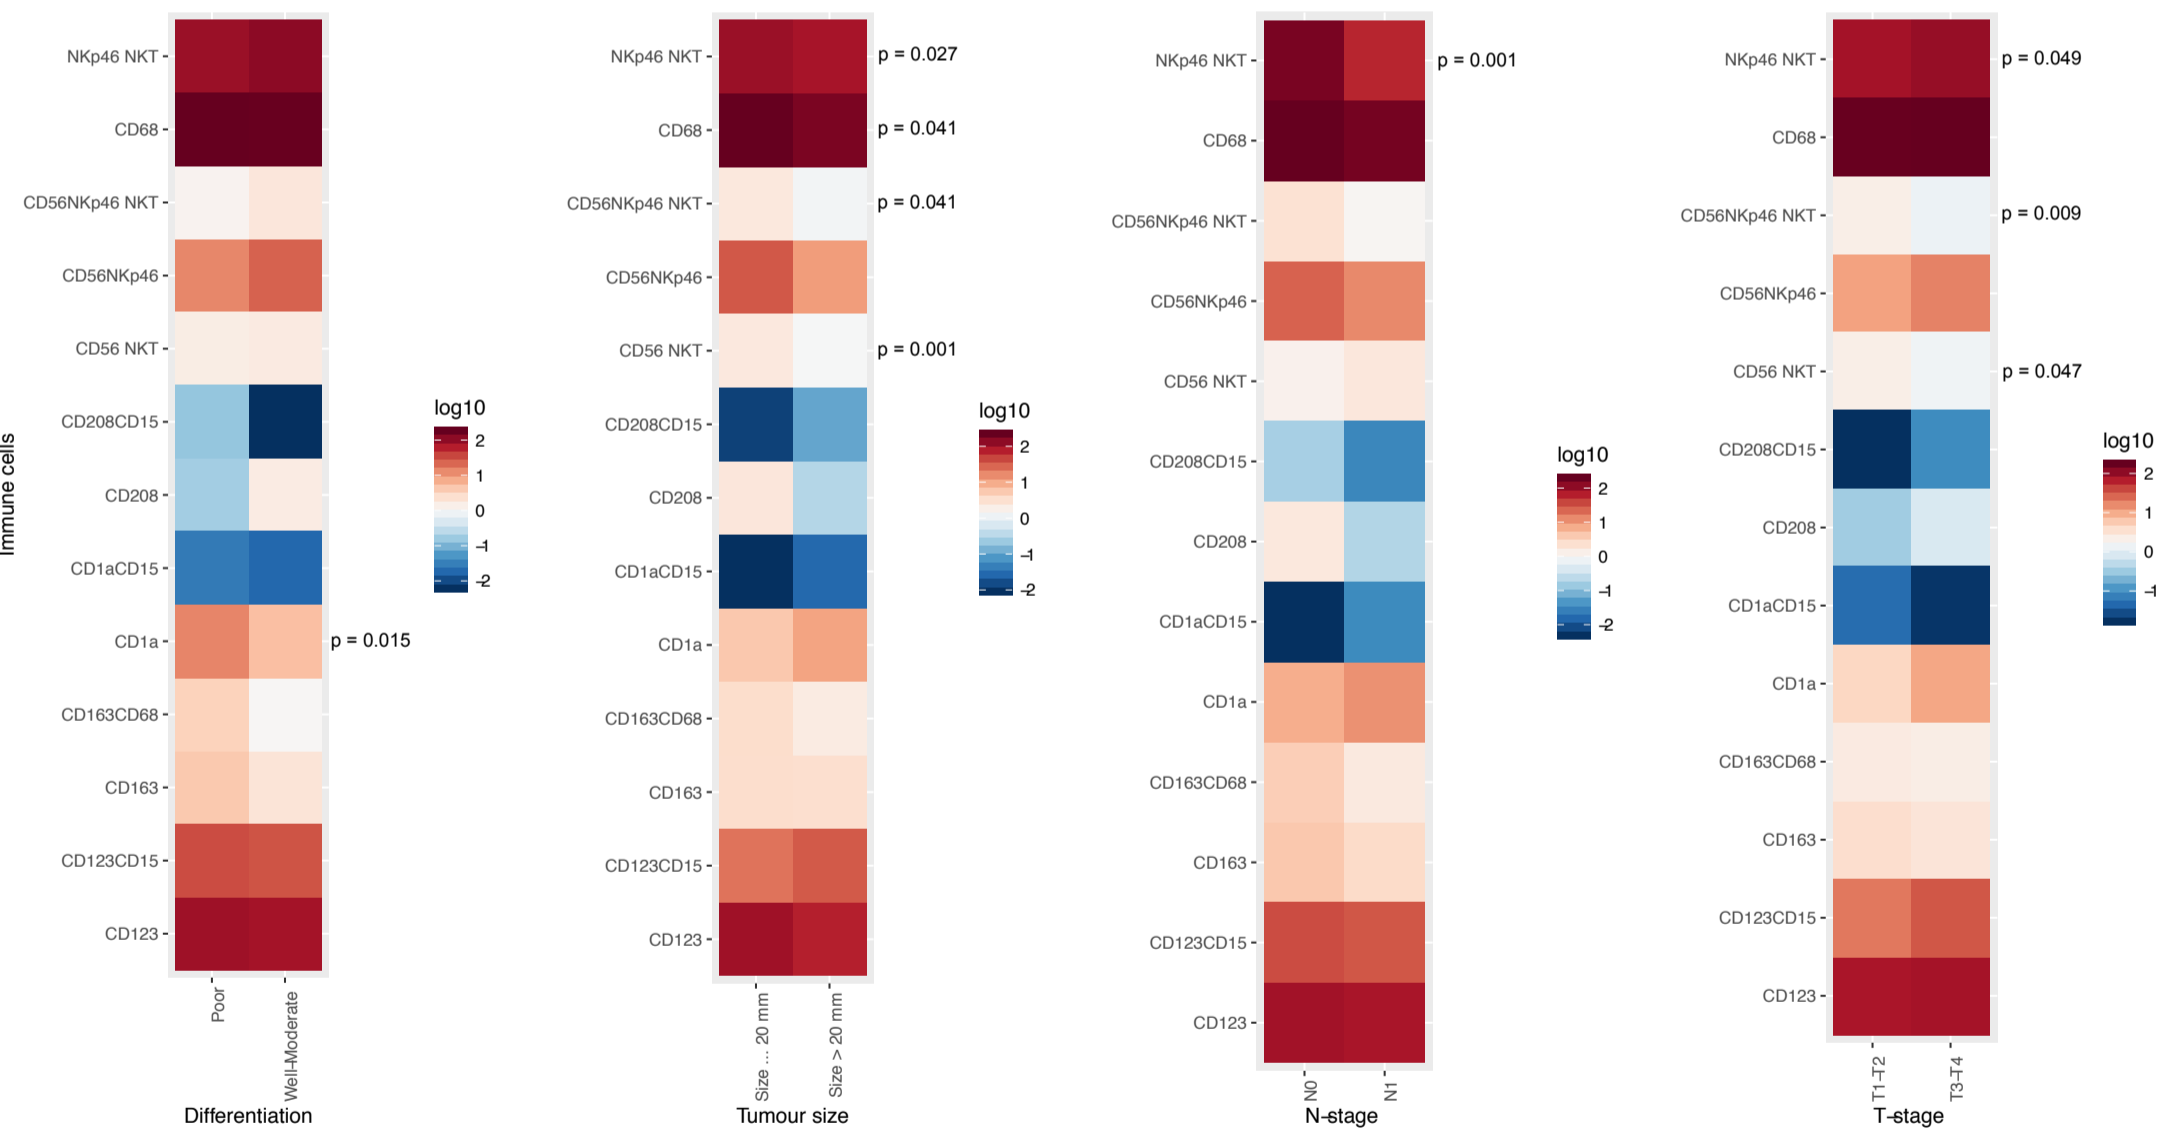

Supplement: Image_2.pdf [file Image_2.pdf]
