# Supplementary material for: Topographical Distribution and Spatial Interactions of Innate and Semi-Innate Immune Cells in Pancreatic and Other Periampullary Adenocarcinoma
Source: PubMed Central journal article supplement (PMC7511775; doi:10.3389/fimmu.2020.558169), 2020-09-10

Additional file 7: Forest plots depicting hazard ratios of death within five years according to tumour to stroma immune cell ratio.

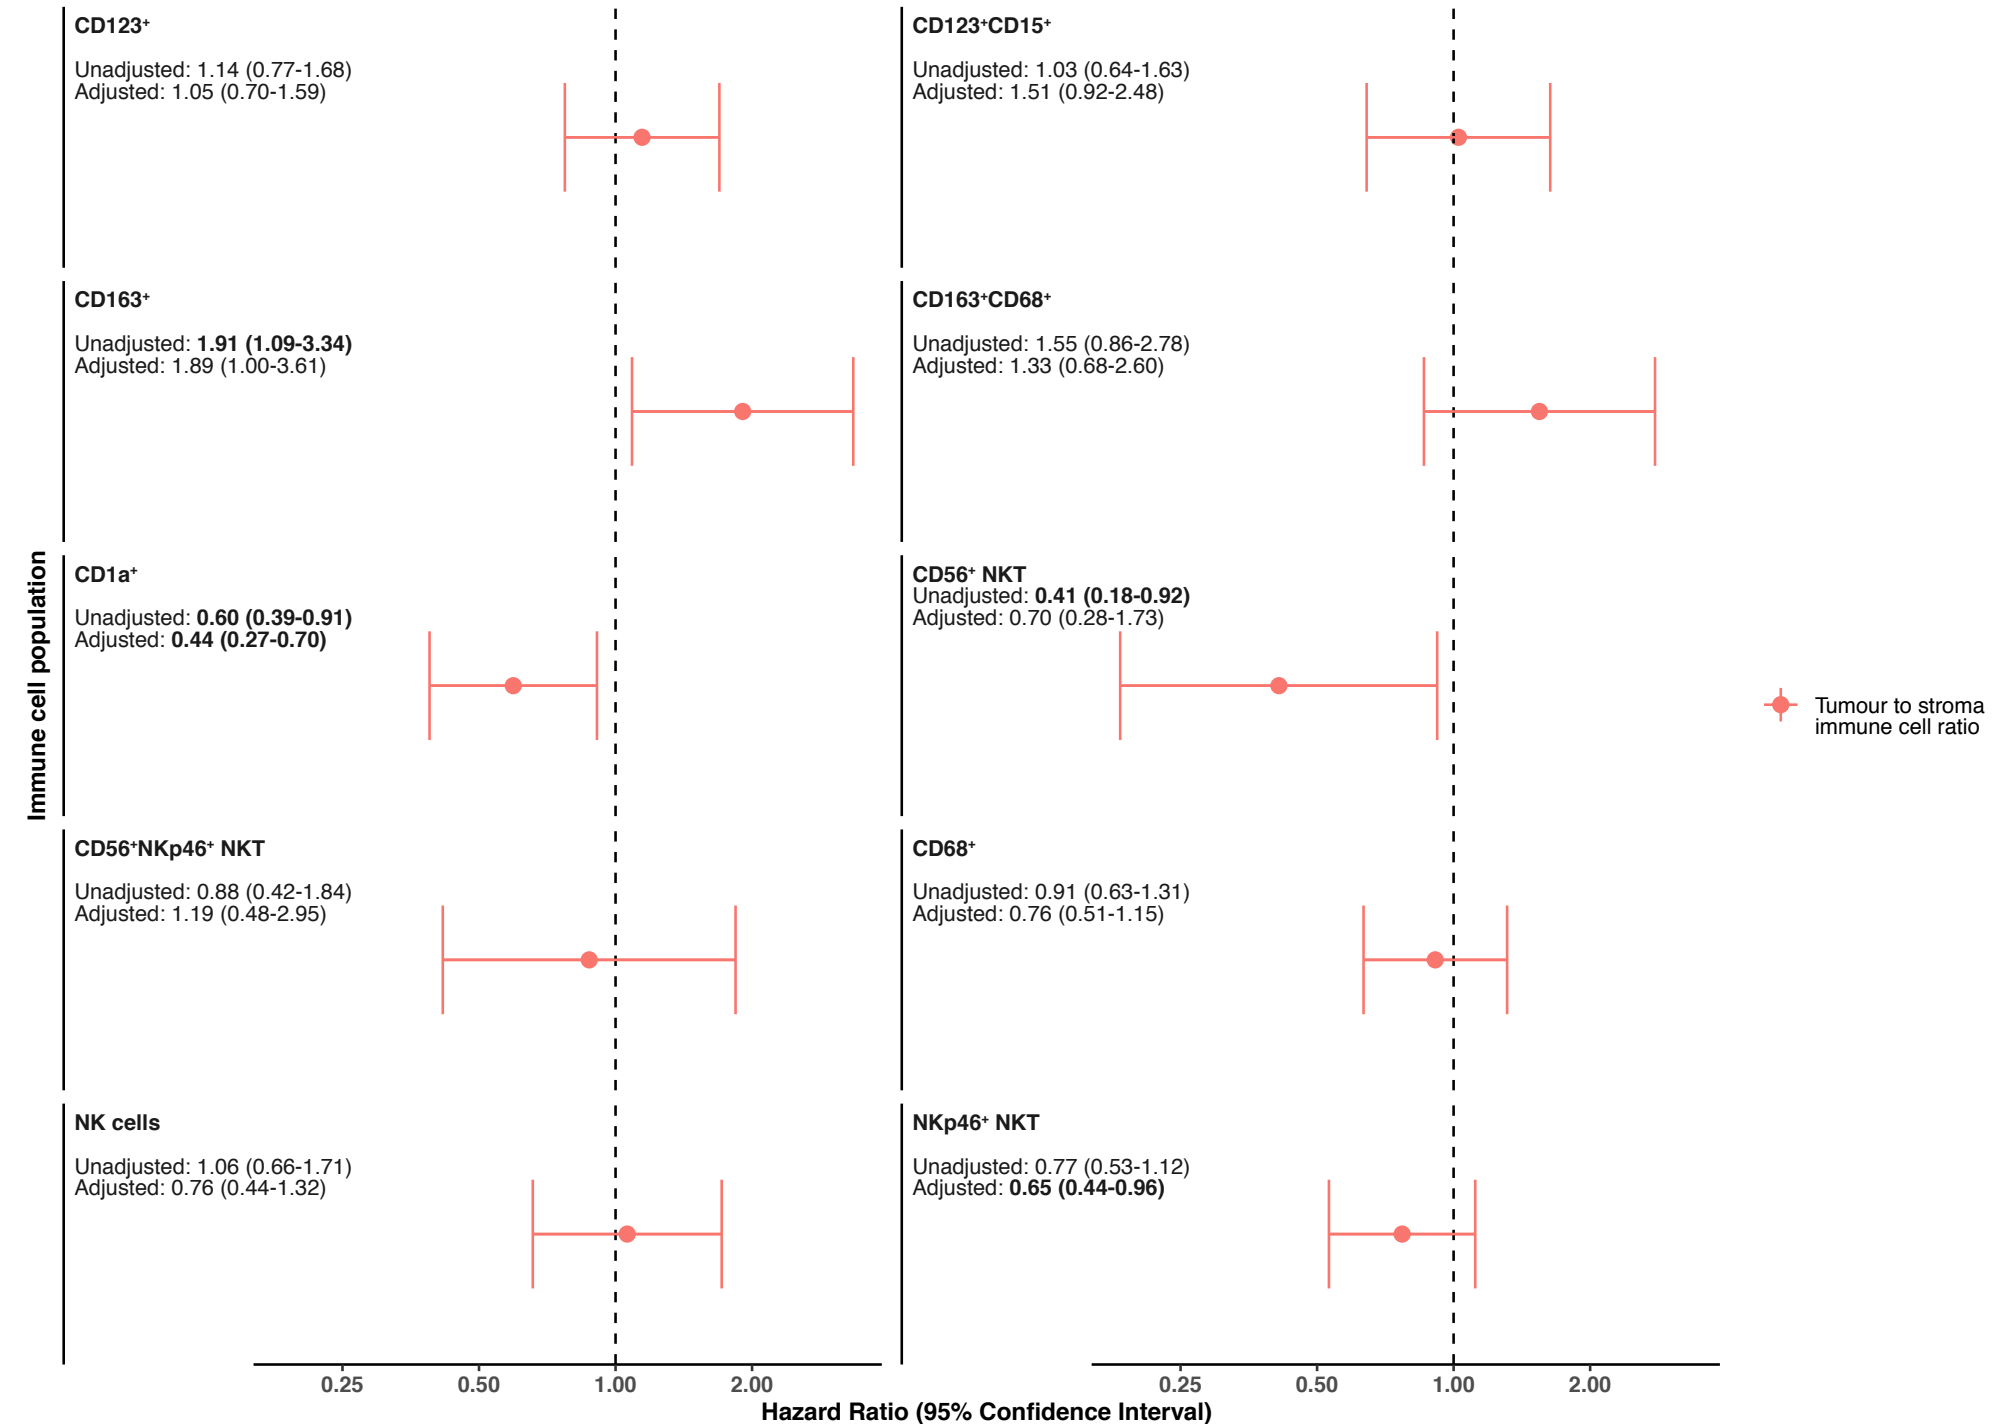

Supplement: Image_4.pdf [file Image_4.pdf]
