# Supplementary material for: Topographical Distribution and Spatial Interactions of Innate and Semi-Innate Immune Cells in Pancreatic and Other Periampullary Adenocarcinoma
Source: Front Immunol. 2020 Sep 10;11:558169. doi: 10.3389/fimmu.2020.558169 (PMC7511775; doi:10.3389/fimmu.2020.558169)
Supplement: Supplementary file 9 [file Table_3.XLSX]

## Sheet: Sheet1
Additional file 5: the associations between innate immune cell infiltration and infiltration of several subpopulations of lymphocytes
		NK cells	CD56+ NKT	NKp46+ NKT	NKp46+CD56+ NKT	CD68+ macrophages	CD163+ myeloid cells	CD163+CD68+ macrophages	CD4+ T cells	CD4+CD45RO+	CD4+ Tregs	CD8+ T cells	CD8+CD45RO+	CD8+ Tregs	B cells
NK cells	Pearson Correlation	1	0.078615	,246**	,236**	-0.0931595	0.0525246	0.0890268	-0.011542	-0.0319483	-0.0399954	-0.0469719	-0.0480749	-0.0484713	-0.0157863
	Sig. (2-tailed)		0.31552	0.00142372	0.0022399	0.233988	0.502842	0.255481	0.885553	0.690264	0.61782	0.557833	0.548612	0.545316	0.843931
CD56+ NKT	Pearson Correlation	0.078615	1	,238**	,569**	-0.0358603	0.112458	0.0105232	0.0597207	0.0542444	0.00991298	0.0295144	-0.00883521	0.0953429	0.0983205
	Sig. (2-tailed)	0.31552		0.0020409	1.46473e-15	0.64747	0.150396	0.893285	0.456041	0.498453	0.901618	0.71278	0.912269	0.233401	0.219058
NKp46+ NKT	Pearson Correlation	,246**	,238**	1	,659**	0.00726638	0.0145011	-0.00151197	,158*	,247**	0.0551285	,335**	,302**	,242**	,554**
	Sig. (2-tailed)	0.00142372	0.0020409		6.3555e-22	0.926198	0.853336	0.984623	0.0476551	0.00173166	0.491468	1.65904e-05	0.000116995	0.00222396	4.16637e-14
NKp46+CD56+ NKT	Pearson Correlation	,236**	,569**	,659**	1	-0.119107	0.0115752	-0.0302539	0.109388	0.0811846	0.0389404	0.0647309	0.0739354	0.0148706	,278**
	Sig. (2-tailed)	0.0022399	1.46473e-15	6.3555e-22		0.127568	0.88269	0.69968	0.171258	0.310561	0.627129	0.419066	0.355883	0.852878	0.000411358
CD68+ marcophages	Pearson Correlation	-0.0931595	-0.0358603	0.00726638	-0.119107	1	0.0774349	,373**	0.0121132	0.102198	0.0129551	,179*	,230**	,203*	0.0227774
		0.233988	0.64747	0.926198	0.127568		0.322863	8.02573e-07	0.879931	0.201333	0.871655	0.024048	0.00363267	0.0103878	0.776356
CD163+ myeloid cells	Pearson Correlation	0.0525246	0.112458	0.0145011	0.0115752	0.0774349	1	,753**	-0.0754534	-0.0379935	-0.0449556	0.0232612	-0.0580973	0.0504341	0.0119161
	Sig. (2-tailed)	0.502842	0.150396	0.853336	0.88269	0.322863		1.81951e-31	0.346066	0.635536	0.574879	0.771735	0.4684	0.529144	0.88187
CD163+CD68+ macrophages	Pearson Correlation	0.0890268	0.0105232	-0.00151197	-0.0302539	,373**	,753**	1	-0.0631746	-0.0493107	-0.0418574	-0.0363315	-0.041742	-0.00314448	-0.0366849
	Sig. (2-tailed)	0.255481	0.893285	0.984623	0.69968	8.02573e-07	1.81951e-31		0.43036	0.538371	0.601537	0.650403	0.602541	0.968722	0.647229
CD4+ T cells	Pearson Correlation	-0.011542	0.0597207	,158*	0.109388	0.0121132	-0.0754534	-0.0631746	1	,692**	,870**	,349**	,414**	,383**	,224**
	Sig. (2-tailed)	0.885553	0.456041	0.0476551	0.171258	0.879931	0.346066	0.43036		6.10655e-24	3.59471e-50	6.6356e-06	5.99186e-08	6.32093e-07	0.00445691
CD4+CD45RO+	Pearson Correlation	-0.0319483	0.0542444	,247**	0.0811846	0.102198	-0.0379935	-0.0493107	,692**	1	,570**	,301**	,580**	,420**	,186*
	Sig. (2-tailed)	0.690264	0.498453	0.00173166	0.310561	0.201333	0.635536	0.538371	6.10655e-24		4.44049e-15	0.00011385	1.12632e-15	3.49122e-08	0.0190703
CD4+ Tregs	Pearson Correlation	-0.0399954	0.00991298	0.0551285	0.0389404	0.0129551	-0.0449556	-0.0418574	,870**	,570**	1	,247**	,371**	,374**	0.0844277
	Sig. (2-tailed)	0.61782	0.901618	0.491468	0.627129	0.871655	0.574879	0.601537	3.59471e-50	4.44049e-15		0.00167763	1.46699e-06	1.23979e-06	0.290018
CD8+ T cells	Pearson Correlation	-0.0469719	0.0295144	,335**	0.0647309	,179*	0.0232612	-0.0363315	,349**	,301**	,247**	1	,663**	,808**	,230**
	Sig. (2-tailed)	0.557833	0.71278	1.65904e-05	0.419066	0.024048	0.771735	0.650403	6.6356e-06	0.00011385	0.00167763		1.61275e-21	6.52737e-38	0.00353242
CD8+CD45RO+	Pearson Correlation	-0.0480749	-0.00883521	,302**	0.0739354	,230**	-0.0580973	-0.041742	,414**	,580**	,371**	,663**	1	,614**	,195*
	Sig. (2-tailed)	0.548612	0.912269	0.000116995	0.355883	0.00363267	0.4684	0.602541	5.99186e-08	1.12632e-15	1.46699e-06	1.61275e-21		8.03987e-18	0.0139164
CD8+ Tregs	Pearson Correlation	-0.0484713	0.0953429	,242**	0.0148706	,203*	0.0504341	-0.00314448	,383**	,420**	,374**	,808**	,614**	1	,261**
	Sig. (2-tailed)	0.545316	0.233401	0.00222396	0.852878	0.0103878	0.529144	0.968722	6.32093e-07	3.49122e-08	1.23979e-06	6.52737e-38	8.03987e-18		0.000906342
B cells	Pearson Correlation	-0.0157863	0.0983205	,554**	,278**	0.0227774	0.0119161	-0.0366849	,224**	,186*	0.0844277	,230**	,195*	,261**	1
	Sig. (2-tailed)	0.843931	0.219058	4.16637e-14	0.000411358	0.776356	0.88187	0.647229	0.00445691	0.0190703	0.290018	0.00353242	0.0139164	0.000906342
** Correlation is significant at the 0.01 level
* Correlation is significant at the 0.05 level
